# Supplementary material for: Maternal Blood Group and Routine Direct Antiglobulin Testing in Neonates: Is There a Role for Selective Neonatal Testing?
Source: MDPI journal article supplement (doi:10.3390/children8050426), 2021-05-20
Supplement: s1 [file s1]

## Supplementary

**Table S1.** Selective High Risk Group Testing.

|                                                                                                             | DAT negative                      | DAT positive | P value | Total       |
|-------------------------------------------------------------------------------------------------------------|-----------------------------------|--------------|---------|-------------|
| Group 1. Screening in mothers blood group O or Rh negative (n=768)*                                         |                                   |              |         |             |
|                                                                                                             | Phototherapy (n=154) <sup>#</sup> |              |         |             |
| Yes                                                                                                         | 12 (13.2%)                        | 11 (17.5%)   | 0.497   | 23 (14.9%)  |
| No                                                                                                          | 79 (86.8%)                        | 52 (82.5%)   |         | 131 (85.1%) |
| Group 2. Screening in mothers with blood group O (n=722)*                                                   |                                   |              |         |             |
|                                                                                                             | Phototherapy (n=143) <sup>#</sup> |              |         |             |
| Yes                                                                                                         | 11 (13.1%)                        | 11 (18.6%)   | 0.5     | 22 (15.4%)  |
| No                                                                                                          | 73 (86.9%)                        | 48 (81.4%)   |         | 212 (84.6%) |
| Group 3. Screening in neonates with blood group B (n=303)*                                                  |                                   |              |         |             |
|                                                                                                             | Phototherapy (n=81) <sup>#</sup>  |              |         |             |
| Yes                                                                                                         | 9 (18.4%)                         | 9 (28.1%)    | 0.413   | 18 (22.2%)  |
| No                                                                                                          | 40 (81.6%)                        | 23 (71.9%)   |         | 63 (77.8%)  |
| Group 4. Screening in neonates with blood group B born to mothers with blood group O or Rh negative (n=96)* |                                   |              |         |             |
|                                                                                                             | Phototherapy (n=47) <sup>#</sup>  |              |         |             |
| Yes                                                                                                         | 4 (23.5%)                         | 8 (26.7%)    | 0.8     | 12 (25.5%)  |
| No                                                                                                          | 13 (76.5%)                        | 22 (73.3%)   |         | 35 (74.5%)  |

\* Number of maternal-neonatal pairs in group; # Number of neonates assessed for phototherapy.

**Table S2.** Percent of neonates requiring phototherapy detected in high risk groups.

| Group tested | Number of patients requiring phototherapy detected | Percent decrease in testing | Positive Predictive Value [95% CI] |
|--------------|----------------------------------------------------|-----------------------------|------------------------------------|
| All cohort   | 36 (100%)                                          |                             |                                    |
| Group 1      | 23 (63.9%)                                         | 47.5%                       | 17.5% [11.6 – 25.4%]               |
| Group 2      | 22 (61.1%)                                         | 50.7%                       | 18.6% [12.5 – 26.8%]               |
| Group 3      | 18 (50%)                                           | 79.3%                       | 28.1% [18.2 – 40.8%]               |
| Group 4      | 12 (33.3%)                                         | 93.4%                       | 26.7% [18.5 – 36.9%]               |
